# Supplementary material for: Association Between Maternal Dietary Pattern and Infant Birth Weight: a Structural Equation Modelling Analysis
Source: Research Square preprint supplement (doi:10.21203/rs.3.rs-228778/v1), 2021-02-23
Supplement: Supplementary file 1 [file 4d643d603c541038558e7d6c.docx]

**Association between maternal dietary pattern and infant birth weight**: **a structural equation modelling** **analysis**

Jerusa da Mota Santana, Valterlinda Alves de Oliveira Queiroz, Marcos Pereira, Enny S. Paixao, Sheila Monteiro Brito, Djanilson Barbosa dos Santos, Ana Marlucia Oliveira

**Supplementary list 1**

| Food groups taken from the the FFQ and their respective foods. Santo Antônio de Jesus, Bahia, Brazil, 2012 a 2013. | | |
| --- | --- | --- |
| **Group** | **Pregnancy trimesters** | **Foods** |
| **Cereals, roots and tubers** | First trimester | Rice; Pasta; Manioc Flour; Sweet Biscuits; Cakes; Savoury Biscuits; Corn/Maize; Oats; Couscous; Tapioca; Bread; Potato and Cassava. |
| Third trimester |
| **Legumes** | First trimester | Beans and Pidgeon Pea |
| Third trimester |
| **Vegetables** | First trimester | Lettuce; Chayote; Carrot; Collard Greens; Cabbage; Tomato; Pumpkin; Cucumber; Scarlet Eggplant; Onion; Garlic and Peppers |
| Third trimester |
| **Fruit** | First trimester | Banana; Papaya; Orange; Apple; Watermelon; Pineapple; Tangerine; Breadfruit; Avocado; Mango; Lime; Passion fruit; Guava; Natural Juice and Plantains. |
| Third trimester |
| **Sugars and sweets** | First trimester | Sugar; Caramels and sweets; Powdered chocolate and Guava paste |
| Third trimester |
| **Processed and industrialized foods** | First trimester | Ready-made products (Soft drinks; Artificial Juice; Stock; Ready-made Soup and Sauces). Cured meat products (Linguiça; Mortadella; Carne-do-sol; Jerky and Bacon). |
| Third trimester |
| **Milk and dairy products** | First trimester | Whole milk; Cheese; Full-fat Yoghurt and Requeijão. |
| Third trimester |
| **Meat and eggs** | First trimester | Eggs; Offal; Beef with bones; Boneless Beef; Chicken; Fish and Pork. |
| Third trimester |
| **Fats** | First trimester | Margerine and Butter |
| Third trimester |
| **Fried Snacks** | First trimester | Fried Snacks |
| Third trimester |
| **Coffee** | First trimester | Coffee. |
| Third trimester |
